# Supplementary material for: Porous Pt–Rh–Te nanotubes: an alleviated poisoning effect for ethanol electrooxidation
Source: Royal Society of Chemistry journal article supplement (doi:10.1039/c9qi01249d), 2019-11-12
Supplement: c9qi01249d1.pdf [file c9qi01249d1.pdf]

## Supporting Information

### Porous Pt-Rh-Te Nanotubes: Alleviated Poisoning Effect for Ethanol

#### Electrooxidation

Liujun Jin <sup>a</sup>, Hui Xu <sup>a</sup>, Chunyan Chen <sup>a</sup>, Hongyuan Shang <sup>a</sup>, Yong Wang <sup>a\*</sup>, Caiqin Wang <sup>b\*</sup> and Yukou Du <sup>a\*</sup>

<sup>a</sup> College of Chemistry, Chemical Engineering and Materials Science, Soochow University, Suzhou 215123, PR China

<sup>b</sup> College of Science & Institute of Materials Physics and Chemistry, Nanjing Forestry University, Nanjing 210037, PR China

\* Corresponding authors: Tel: 86-512-65880089, Fax: 86-512-65880089;

E-mail: yowang@suda.edu.cn (Y. Wang); wangcaiqin@njfu.edu.cn (C.

Wang); duyk@suda.edu.cn (Y. Du)

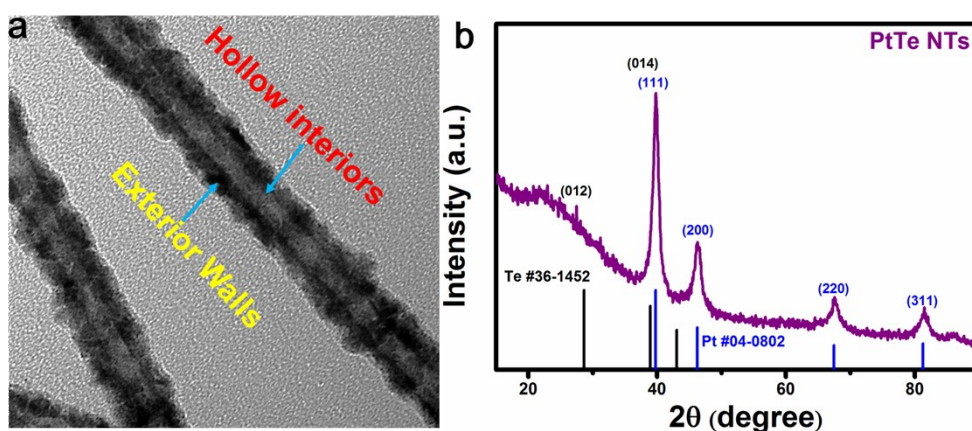

Fig. S1 (a) Representative TEM image of Pt<sub>5</sub>RhTe<sub>6</sub> NTs, (b) XRD pattern of PtTe NTs.

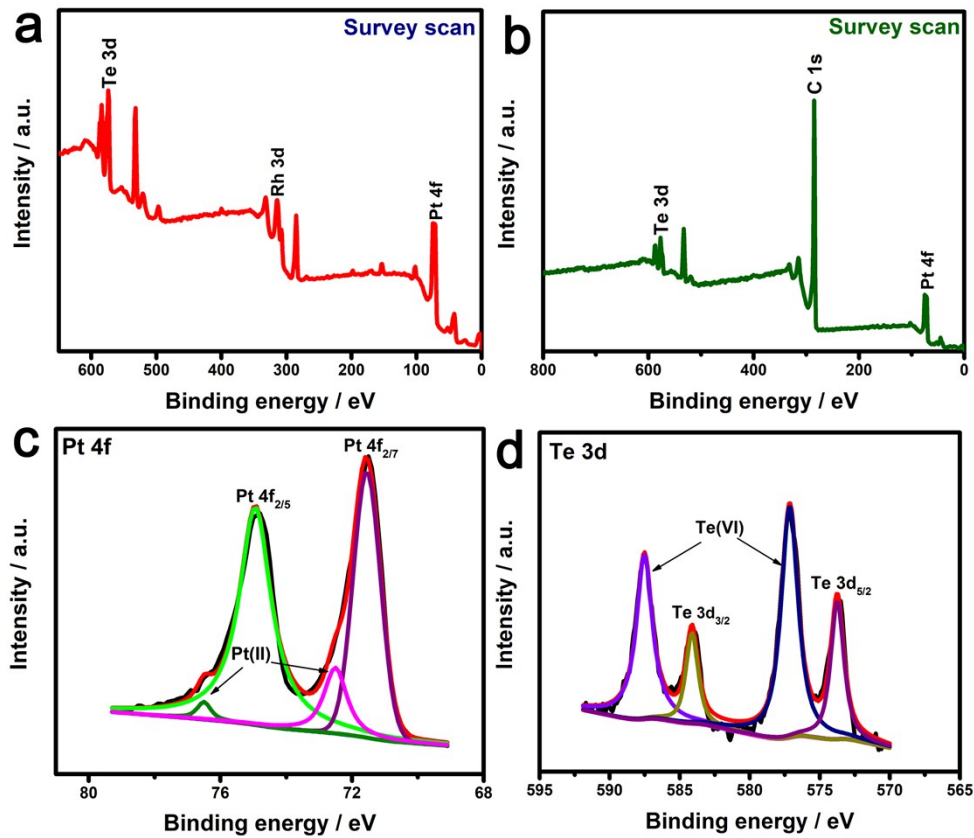

Fig. S2 XPS spectrum of PtTe, Pt<sub>5</sub>RhTe<sub>6</sub> NTs, (a, b) survey scan, (c) Pt 4f, (d) Te 3d.

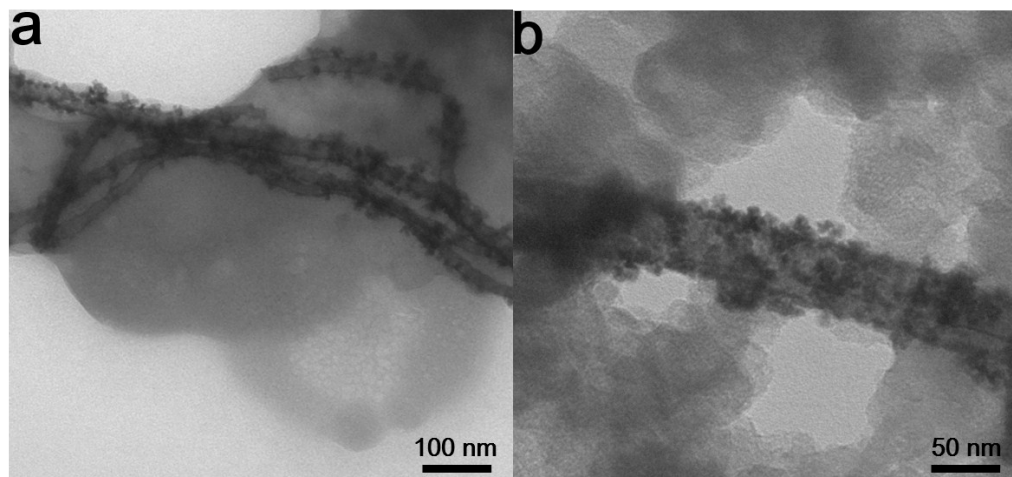

Fig.S3 Representative TEM images of Pt<sub>5</sub>RhTe<sub>6</sub> NTs after long-term electrochemical cycles.

Table S1 Comparison of the as-synthesized Pt<sub>5</sub>RhTe<sub>6</sub> NTs with other catalysts reported previously for EOR in the alkaline electrolyte.

| Catalysts                                                    | Peaks currents<br>from CV curves<br>mA/mg | Electrolytes                                                        | References                                            |
|--------------------------------------------------------------|-------------------------------------------|---------------------------------------------------------------------|-------------------------------------------------------|
| Pt <sub>5</sub> RhTe <sub>6</sub> NTs                        | 3370.69                                   | 1.0 M KOH + 1.0<br>M ethanol                                        | This work                                             |
| PtCoRh<br>HBNA <sub>s</sub>                                  | 1750                                      | 1.0 M KOH + 1.0<br>M ethanol                                        | J. Coll. Inter. Sci., 554 (2019)<br>512-519           |
| Pt <sub>3</sub> RhNi <sub>2</sub> -<br>ANA <sub>s</sub>      | 1390                                      | 1.0 M KOH + 1.0<br>M ethanol                                        | Nano Res., 10 (2018) 3324-3332                        |
| Pt <sub>94</sub> Zn <sub>6</sub> NW <sub>s</sub>             | 400                                       | 0.1 M HClO <sub>4</sub> + 0.2<br>M C <sub>2</sub> H <sub>5</sub> OH | Nano. Res 2019, 12, 5, 1173-<br>1179.                 |
| Networked<br>Pt <sub>6</sub> Sn <sub>3</sub> NW <sub>s</sub> | 1080                                      | 0.1 M HClO <sub>4</sub> + 0.5<br>M C <sub>2</sub> H <sub>5</sub> OH | J. Mater. Chem. A <b>2017</b> , 5,<br>24626–24630.    |
| PtRh ND <sub>s</sub>                                         | 460                                       | 1.0 M KOH + 1.0<br>M ethanol                                        | ACS Appl. Mater. Interfaces, 10<br>(2018) 19755-19763 |
